# Supplementary material for: Circulating genomic landscape following cyclin-dependent kinase 4/6 inhibitors exposure in HR + /HER2− metastatic breast cancer: a retrospective multi-institutional Consortium analysis
Source: Springer Nature journal article supplement (doi:10.1038/s41523-025-00802-2), 2025-08-16
Supplement: MOESM1 [file 41523_2025_802_MOESM1_ESM.pdf]

## SUPPLEMENTARY MATERIALS

### Table of contents

- Table S1. Prevalence of somatic single gene CNVs in the study cohort of 93 HR+/HER2 MBC patients, ET, and no-ET subgroup
- Table S2. Prevalence of somatic single gene SNVs in the study cohort of 93 HR+/HER2 MBC patients, ET and no-ET subgroups
- Table S3. Prevalence of somatic single gene Syn alterations in the study cohort of 93 HR+/HER2 MBC patients, ET and no-ET subgroups
- Table S4. Prevalence of somatic pathway mutations in the study cohort of 93 HR+/HER2 MBC patients, ET and no-ET subgroup
- Table S5. Clinical-pathological characteristics of the CD4/6i naïve control cohort of 181 HR+/HER2- patients
- Table S6. Prevalence of somatic SNVs e CNVs pathway mutations in the post-CDK4/6i and CDK4/6i naïve cohorts
- Table S7. Prevalence of somatic single gene CNVs in the post-CDK4/6i and CDK4/6i naïve cohorts
- Table S8. Prevalence of somatic single gene SNVs in the post-CDK4/6i and CDK4/6i naïve cohorts
- Table S9. Multivariable logistic regression analysis of ESR1 and ER pathway between post-CDK4/6i and CDK4/6i naïve cohort
- Figure S1. Differences in MAF (A) and NOA (B) between post-CDK4/6i and CDK4/6i naïve cohorts represented by box-plot

**Table S1. Prevalence of somatic single gene CNVs in the study cohort of 93 HR+/HER2 MBC patients, ET, and no-ET subgroup**

Abbreviations: CNVs: Copy Number Variations; ET: endocrine therapy; N: number

| Gene (CNVs)   | No-ET<br>N. (%) | ET<br>N. (%) | Total<br>N. (%) | P value (Fisher exact test) |
|---------------|-----------------|--------------|-----------------|-----------------------------|
| <i>KIT</i>    | 1 (5·0)         | 0 (0·0)      | 1 (1·1)         | 0·21                        |
| <i>PDGFRA</i> | 1 (5·0)         | 0 (0·0)      | 1 (1·1)         | 0·21                        |
| <i>BRAF</i>   | 1 (5·0)         | 1 (1·4)      | 2 (2·2)         | 0·39                        |
| <i>ERBB2</i>  | 0(0·0)          | 0(0·0)       | 0 (0·0)         | --                          |
| <i>FGFR1</i>  | 3 (15·0)        | 9 (12·3)     | 12 (12·9)       | 0·72                        |
| <i>CDK4</i>   | 2 (10·0)        | 0 (0·0)      | 2 (2·2)         | 0·04                        |
| <i>CCND1</i>  | 4 (20·0)        | 6 (8·2)      | 10 (10·8)       | 0·21                        |
| <i>KRAS</i>   | 2 (10·0)        | 2 (2·7)      | 4 (4·3)         | 0·20                        |
| <i>AR</i>     | 1 (5·0)         | 1 (1·4)      | 2 (2·2)         | 0·39                        |
| <i>RAF1</i>   | 3 (15·0)        | 0 (0·0)      | 3 (3·2)         | 0·009                       |
| <i>CDK6</i>   | 1 (5·0)         | 2 (2·7)      | 3 (3·2)         | 0·52                        |
| <i>PIK3CA</i> | 3 (15·0)        | 3 (4·1)      | 6 (6·5)         | 0·11                        |
| <i>EGFR</i>   | 3 (15·0)        | 2 (2·7)      | 5 (5·4)         | 0·06                        |
| <i>MYC</i>    | 4 (20·0)        | 2 (2·7)      | 6 (6·5)         | 0·02                        |
| <i>MET</i>    | 0 (0·0)         | 0 (0·0)      | 0 (0·0)         | --                          |
| <i>CCNE1</i>  | 2 (10·0)        | 0 (0·0)      | 2 (2·2)         | 0·04                        |
| <i>CCND2</i>  | 1 (5·0)         | 0 (0·0)      | 1 (1·1)         | 0·21                        |
| <i>FGFR2</i>  | 1 (5·0)         | 0 (0·0)      | 1 (1·1)         | 0·21                        |
| <i>ERBBS</i>  | 0 (0·0)         | 0 (0·0)      | 0 (0·0)         | --                          |
| <i>ESR1</i>   | 0 (0·0)         | 0 (0·0)      | 0 (0·0)         | --                          |

**Table S2. Prevalence of somatic single gene SNVs in the study cohort of 93 HR+/HER2 MBC patients, ET and no-ET subgroups**

Abbreviations: ET: endocrine therapy; N: number; SNVs: Single Nucleotide Variations

| Gene (SNVs)   | No-ET<br>N. (%) | ET<br>N. (%) | Total<br>N. (%) | P value (Fisher exact test) |
|---------------|-----------------|--------------|-----------------|-----------------------------|
| <i>KIT</i>    | 0 (0·0)         | 0 (0·0)      | 0 (0·0)         | --                          |
| <i>PDGFRA</i> | 0 (0·0)         | 0 (0·0)      | 0 (0·0)         | --                          |
| <i>BRAF</i>   | 1 (5·0)         | 2 (2·7)      | 3 (3·2)         | 0·52                        |
| <i>ERBB2</i>  | 1 (5·0)         | 2 (2·7)      | 3 (3·2)         | 0·52                        |
| <i>FGFR1</i>  | 0 (0·0)         | 0 (0·0)      | 0 (0·0)         | --                          |
| <i>CCND1</i>  | 0 (0·0)         | 0 (0·0)      | 0 (0·0)         | --                          |
| <i>KRAS</i>   | 0 (0·0)         | 5 (6·8)      | 5 (5·4)         | 0·58                        |
| <i>RAF1</i>   | 0 (0·0)         | 0 (0·0)      | 0 (0·0)         | --                          |
| <i>PIK3CA</i> | 9 (45·0)        | 26 (35·6)    | 35 (37·6)       | 0·45                        |
| <i>EGFR</i>   | 0 (0·0)         | 2 (2·7)      | 2 (2·2)         | 0·99                        |
| <i>FGFR2</i>  | 0 (0·0)         | 1 (1·4)      | 1 (1·1)         | 0·99                        |
| <i>ESR1</i>   | 12 (60·0)       | 31 (42·5)    | 43 (46·2)       | 0·21                        |
| <i>TP53</i>   | 6 (30·0)        | 23 (31·5)    | 29 (31·2)       | 0·99                        |
| <i>ARID1A</i> | 1 (5·0)         | 4 (5·5)      | 5 (5·4)         | 0·99                        |
| <i>CDKN2A</i> | 0 (0·0)         | 1 (1·4)      | 1 (1·1)         | 0·99                        |
| <i>NF1</i>    | 0 (0·0)         | 3 (4·1)      | 3 (3·2)         | 0·99                        |
| <i>PTEN</i>   | 0 (0·0)         | 5 (6·8)      | 5 (5·4)         | 0·58                        |
| <i>CDH1</i>   | 0 (0·0)         | 4 (5·5)      | 4 (4·3)         | 0·57                        |
| <i>AKT1</i>   | 0 (0·0)         | 2 (2·7)      | 2 (2·2)         | 0·99                        |
| <i>GATA3</i>  | 1 (5·0)         | 8 (11·0)     | 9 (9·7)         | 0·68                        |
| <i>SMAD4</i>  | 0 (0·0)         | 2 (2·7)      | 2 (2·2)         | 0·99                        |
| <i>RB1</i>    | 1 (5·0)         | 2 (2·7)      | 3 (3·2)         | 0·52                        |
| <i>FBXW7</i>  | 0 (0·0)         | 0 (0·0)      | 0 (0·0)         | --                          |
| <i>HRAS</i>   | 1 (5·0)         | 0 (0·0)      | 1 (1·1)         | 0·21                        |
| <i>GNAS</i>   | 0 (0·0)         | 1 (1·4)      | 1 (1·1)         | 0·99                        |
| <i>BRCA2</i>  | 1 (5·0)         | 1 (1·4)      | 2 (2·2)         | 0·39                        |
| <i>IDH1</i>   | 0 (0·0)         | 0 (0·0)      | 0 (0·0)         | --                          |
| <i>NRAS</i>   | 0 (0·0)         | 0 (0·0)      | 0 (0·0)         | --                          |
| <i>BRCA1</i>  | 0 (0·0)         | 2 (2·7)      | 2 (2·2)         | 0·99                        |
| <i>VHL</i>    | 0 (0·0)         | 0 (0·0)      | 0 (0·0)         | --                          |
| <i>RHOA</i>   | 0 (0·0)         | 0 (0·0)      | 0 (0·0)         | --                          |
| <i>APC</i>    | 0 (0·0)         | 1 (1·4)      | 1 (1·1)         | 0·99                        |
| <i>JAK2</i>   | 0 (0·0)         | 0 (0·0)      | 0 (0·0)         | --                          |
| <i>STK11</i>  | 0 (0·0)         | 1 (1·4)      | 1 (1·1)         | 0·99                        |

|               |         |         |         |      |
|---------------|---------|---------|---------|------|
| <i>PTPN11</i> | 0 (0-0) | 0 (0-0) | 0 (0-0) | --   |
| <i>ATM</i>    | 0 (0-0) | 1 (1-4) | 1 (1-1) | 0-99 |
| <i>RET</i>    | 0 (0-0) | 0 (0-0) | 0 (0-0) | --   |
| <i>TERT</i>   | 0 (0-0) | 0 (0-0) | 0 (0-0) | --   |
| <i>IDH2</i>   | 0 (0-0) | 0 (0-0) | 0 (0-0) | --   |
| <i>FGFR3</i>  | 0 (0-0) | 0 (0-0) | 0 (0-0) | --   |
| <i>MAPK1</i>  | 0 (0-0) | 0 (0-0) | 0 (0-0) | --   |
| <i>RIT1</i>   | 0 (0-0) | 0 (0-0) | 0 (0-0) | --   |
| <i>CTNNB1</i> | 0 (0-0) | 1 (1-4) | 1 (1-1) | 0-99 |
| <i>CDK12</i>  | 0 (0-0) | 0 (0-0) | 0 (0-0) | --   |
| <i>TSC1</i>   | 0 (0-0) | 1 (1-4) | 1 (1-1) | 0-99 |
| <i>ARAF</i>   | 0 (0-0) | 0 (0-0) | 0 (0-0) | --   |
| <i>NFE2L2</i> | 0 (0-0) | 1 (1-4) | 1 (1-1) | 0-99 |
| <i>MPL</i>    | 0 (0-0) | 0 (0-0) | 0 (0-0) | --   |
| <i>HNFI1A</i> | 0 (0-0) | 0 (0-0) | 0 (0-0) | --   |
| <i>NOTCH1</i> | 0 (0-0) | 0 (0-0) | 0 (0-0) | --   |
| <i>CHEK2</i>  | 0 (0-0) | 2 (2-7) | 2 (2-2) | 0-99 |
| <i>JAK3</i>   | 0 (0-0) | 0 (0-0) | 0 (0-0) | --   |
| <i>MAP2K2</i> | 0 (0-0) | 0 (0-0) | 0 (0-0) | --   |

**Table S3. Prevalence of somatic single gene Syn alterations in the study cohort of 93 HR+/HER2 MBC patients, ET and no-ET subgroups**

Abbreviations: ET: endocrine therapy N: number; Syn: Synonymous

| Gene (syn)    | No-ET<br>No. (%) | ET<br>No. (%) | Total<br>No. (%) | P value (Fisher exact test) |
|---------------|------------------|---------------|------------------|-----------------------------|
| <i>KIT</i>    | 0 (0-0)          | 0 (0-0)       | 0 (0-0)          | --                          |
| <i>PDGFRA</i> | 0 (0-0)          | 2 (2-7)       | 2 (2-2)          | 0-99                        |
| <i>BRAF</i>   | 0 (0-0)          | 0 (0-0)       | 0 (0-0)          | --                          |
| <i>ERBB2</i>  | 0 (0-0)          | 0 (0-0)       | 0 (0-0)          | --                          |
| <i>FGFR1</i>  | 0 (0-0)          | 1 (1-4)       | 1 (1-1)          | 0-99                        |
| <i>RAF1</i>   | 0 (0-0)          | 0 (0-0)       | 0 (0-0)          | --                          |
| <i>PIK3CA</i> | 0 (0-0)          | 0 (0-0)       | 0 (0-0)          | --                          |
| <i>EGFR</i>   | 0 (0-0)          | 0 (0-0)       | 0 (0-0)          | --                          |
| <i>FGFR2</i>  | 0 (0-0)          | 0 (0-0)       | 0 (0-0)          | --                          |
| <i>ESR1</i>   | 1 (5-0)          | 0 (0-0)       | 1 (1-1)          | 0-21                        |
| <i>TP53</i>   | 1 (5-0)          | 1 (1-4)       | 2 (2-2)          | 0-39                        |
| <i>ARID1A</i> | 0 (0-0)          | 0 (0-0)       | 0 (0-0)          | --                          |
| <i>CDKN2A</i> | 0 (0-0)          | 2 (2-7)       | 2 (2-2)          | 0-99                        |
| <i>NF1</i>    | 0 (0-0)          | 2 (2-7)       | 2 (2-2)          | 0-99                        |
| <i>PTEN</i>   | 0 (0-0)          | 0 (0-0)       | 0 (0-0)          | --                          |
| <i>CDH1</i>   | 0 (0-0)          | 1 (1-4)       | 1 (1-1)          | 0-99                        |
| <i>AKT1</i>   | 0 (0-0)          | 0 (0-0)       | 0 (0-0)          | --                          |
| <i>GATA3</i>  | 0 (0-0)          | 0 (0-0)       | 0 (0-0)          | --                          |
| <i>SMAD4</i>  | 0 (0-0)          | 0 (0-0)       | 0 (0-0)          | --                          |
| <i>RB1</i>    | 0 (0-0)          | 0 (0-0)       | 0 (0-0)          | --                          |
| <i>HRAS</i>   | 0 (0-0)          | 0 (0-0)       | 0 (0-0)          | --                          |
| <i>BRCA2</i>  | 0 (0-0)          | 0 (0-0)       | 0 (0-0)          | --                          |
| <i>IDH1</i>   | 1 (5-0)          | 0 (0-0)       | 1 (1-1)          | 0-21                        |
| <i>BRCA1</i>  | 0 (0-0)          | 3 (4-1)       | 3(3-2)           | 0-99                        |
| <i>VHL</i>    | 0 (0-0)          | 0 (0-0)       | 0 (0-0)          | --                          |
| <i>RHOA</i>   | 0 (0-0)          | 0 (0-0)       | 0 (0-0)          | --                          |
| <i>APC</i>    | 0 (0-0)          | 0 (0-0)       | 0 (0-0)          | --                          |
| <i>STK11</i>  | 0 (0-0)          | 0 (0-0)       | 0 (0-0)          | --                          |
| <i>PTPN11</i> | 0 (0-0)          | 0 (0-0)       | 0 (0-0)          | --                          |
| <i>ATM</i>    | 0 (0-0)          | 0 (0-0)       | 0 (0-0)          | --                          |
| <i>RET</i>    | 0 (0-0)          | 0 (0-0)       | 0 (0-0)          | --                          |
| <i>TERT</i>   | 0 (0-0)          | 0 (0-0)       | 0 (0-0)          | --                          |
| <i>FGFR3</i>  | 0 (0-0)          | 0 (0-0)       | 0 (0-0)          | --                          |
| <i>MAP2K1</i> | 0 (0-0)          | 0 (0-0)       | 0 (0-0)          | --                          |

|               |         |         |         |      |
|---------------|---------|---------|---------|------|
| <i>RIT1</i>   | 0 (0-0) | 0 (0-0) | 0 (0-0) | --   |
| <i>CTNNB1</i> | 0 (0-0) | 0 (0-0) | 0 (0-0) | --   |
| <i>CDK12</i>  | 0 (0-0) | 0 (0-0) | 0 (0-0) | --   |
| <i>TSC1</i>   | 1 (5-0) | 0 (0-0) | 1 (1-1) | --   |
| <i>ARAF</i>   | 0 (0-0) | 0 (0-0) | 0 (0-0) | 0-21 |
| <i>NFE2L2</i> | 0 (0-0) | 0 (0-0) | 0 (0-0) | --   |
| <i>HNFI1A</i> | 0 (0-0) | 1 (1-4) | 1 (1-1) | --   |
| <i>NOTCH1</i> | 0 (0-0) | 1 (1-4) | 1 (1-1) | 0-99 |
| <i>MAP2K2</i> | 0 (0-0) | 0 (0-0) | 0 (0-0) | 0-99 |
| <i>AR</i>     | 0 (0-0) | 3 (4-1) | 3(3-2)  | --   |
| <i>MET</i>    | 0 (0-0) | 2 (2-7) | 2 (2-2) | 0-99 |
| <i>MTOR</i>   | 0 (0-0) | 1 (1-4) | 1 (1-1) | 0-99 |
| <i>CCNE1</i>  | 0 (0-0) | 0 (0-0) | 0 (0-0) | 0-99 |
| <i>NTRK3</i>  | 0 (0-0) | 1 (1-4) | 1 (1-1) | --   |
| <i>NTRK1</i>  | 0 (0-0) | 1 (1-4) | 1 (1-1) | 0-99 |
| <i>ALK</i>    | 0 (0-0) | 1 (1-4) | 1 (1-1) | 0-99 |
| <i>FBXW7</i>  | 0 (0-0) | 0 (0-0) | 0 (0-0) | 0-99 |
| <i>MAPK3</i>  | 0 (0-0) | 0 (0-0) | 0 (0-0) | --   |
| <i>MYC</i>    | 0 (0-0) | 1 (1-4) | 1 (1-1) | --   |
| <i>MLH1</i>   | 0 (0-0) | 0 (0-0) | 0 (0-0) | 0-99 |
| <i>ROS1</i>   | 0 (0-0) | 0 (0-0) | 0 (0-0) | --   |
| <i>CCND2</i>  | 0 (0-0) | 0 (0-0) | 0 (0-0) | --   |
| <i>SMO</i>    | 0 (0-0) | 0 (0-0) | 0 (0-0) | --   |
| <i>GNAI1</i>  | 0 (0-0) | 0 (0-0) | 0 (0-0) | --   |
| <i>CDKN2B</i> | 0 (0-0) | 0 (0-0) | 0 (0-0) | --   |
| <i>CCND1</i>  | 0 (0-0) | 0 (0-0) | 0 (0-0) | --   |
| <i>CDK4</i>   | 0 (0-0) | 0 (0-0) | 0 (0-0) | --   |
| <i>CDK6</i>   | 0 (0-0) | 1 (1-4) | 1 (1-1) | --   |
| <i>DDR2</i>   | 0 (0-0) | 0 (0-0) | 0 (0-0) | 0-99 |
| <i>MSH6</i>   | 0 (0-0) | 0 (0-0) | 0 (0-0) | --   |

**Table S4. Prevalence of somatic pathway mutations in the study cohort of 93 HR+/HER2 MBC patients, ET and no-ET subgroup**

Abbreviations: CNVs: Copy Number Variations; N: number; Syn: Synonymous; SNVs, Single Nucleotide Variations, VUS: variant of uncertain significance

| Pathway         | No-ET<br>N. (%) | ET<br>N. (%) | Total<br>N. (%) | P value (Fisher exact test) |
|-----------------|-----------------|--------------|-----------------|-----------------------------|
| PI3K SNVs       | 9 (45.0)        | 30 (41.1)    | 39 (41.9)       | 0.80                        |
| ER SNVs         | 12 (60.0)       | 34 (46.6%)   | 46 (49.5)       | 0.32                        |
| p53 SNVs        | 6 (30.0)        | 26 (35.6)    | 32 (34.4%)      | 0.79                        |
| RTK SNVs        | 1 (5.0)         | 4 (5.5)      | 5 (5.4)         | 0.99                        |
| Cell-cycle SNVs | 1 (5.0)         | 3 (4.1)      | 4 (4.3)         | 0.99                        |
| RAS SNVs        | 1 (5.0)         | 7 (9.6)      | 8 (8.6)         | 0.99                        |
| NOTCH1 SNVs     | 0 (0.0)         | 0 (0.0)      | 0 (0.0)         | --                          |
| RAF SNVs        | 1 (5.0)         | 2 (2.7)      | 3 (3.2)         | 0.52                        |
| WNT SNVs        | 0 (0.0)         | 2 (2.7)      | 2 (2.2)         | 0.99                        |
| MEK SNVs        | 0 (0.0)         | 0 (0.0)      | 0 (0.0)         | --                          |
| NRF2 SNVs       | 0 (0.0)         | 1 (1.4)      | 1 (1.1)         | 0.99                        |
| RTK CNVs        | 5 (25.0)        | 10 (13.7)    | 15 (16.1)       | 0.30                        |
| RAF CNVs        | 3 (15.0)        | 1 (1.4%)     | 4 (4.3)         | 0.03                        |
| Cell-cycle CNVs | 5 (25.0)        | 6 (8.2)      | 11 (11.8)       | 0.054                       |
| RAS CNVs        | 2 (10.0)        | 2 (2.7)      | 4 (4.3)         | 0.20                        |
| ER CNVs         | 1 (5.0)         | 1 (1.4)      | 2 (2.2)         | 0.39                        |
| PI3K CNVs       | 3 (15.0)        | 3 (4.1)      | 6 (6.5)         | 0.11                        |
| MYC CNVs        | 4 (20.0)        | 2 (2.7)      | 6 (6.5)         | 0.02                        |
| ER vus          | 1 (5.0)         | 6 (8.2)      | 7 (7.5)         | 0.99                        |
| RAF vus         | 0 (0.0)         | 1 (1.4)      | 1(1.1)          | 0.99                        |
| RTK vus         | 2 (10.0)        | 19 (26)      | 21 (22.6)       | 0.22                        |
| NOTCH1 vus      | 0               | 2 (2.7)      | 2 (2.2)         | 0.99                        |
| PI3K vus        | 3 (15.0)        | 5 (6.8)      | 8 (8.6)         | 0.36                        |
| Cell-cycle vus  | 2 (10)          | 5 (6.8)      | 7 (7.5)         | 0.64                        |
| RAS vus         | 1 (5.0)         | 7 (9.6)      | 8 (8.6)         | 0.99                        |
| p53 vus         | 1 (5.0)         | 8 (11.0)     | 9 (9.7)         | 0.68                        |
| MYC vus         | 0 (0.0)         | 2 (2.7)      | 2 (2.2)         | 0.99                        |
| WNT vus         | 1 (5.0)         | 6 (8.2)      | 7 (7.5)         | 0.99                        |
| MEK vus         | 0 (0.0)         | 1 (1.4)      | 1 (1.1)         | 0.99                        |
| NRF2 vus        | 0(0.0)          | 0(0.0)       | 0 (0.0)         | --                          |
| RTK syn         | 0 (0.0)         | 7 (9.6)      | 7 (7.5)         | 0.34                        |
| RAF syn         | 0 (0.0)         | 0 (0.0)      | 0 (0.0)         | --                          |
| WNT syn         | 0(0.0)          | 0(0.0)       | 0(0.0)          | --                          |

|                       |         |         |         |      |
|-----------------------|---------|---------|---------|------|
| <b>NOTCH1 syn</b>     | 0 (0-0) | 1 (1-4) | 1 (1-1) | 0-99 |
| <b>ER syn</b>         | 1 (5-0) | 3 (4-1) | 4 (4-3) | 0-99 |
| <b>PI3K syn</b>       | 1 (5-0) | 1 (1-4) | 2 (2-2) | 0-39 |
| <b>RAS syn</b>        | 0 (0-0) | 2 (2-7) | 2 (2-2) | 0-99 |
| <b>Cell-cycle syn</b> | 0 (0-0) | 3 (4-1) | 3 (3-2) | 0-99 |
| <b>MEK syn</b>        | 0 (0-0) | 0 (0-0) | 0 (0-0) | --   |
| <b>P53 syn</b>        | 1 (5-0) | 3 (4-1) | 4 (4-3) | 0-99 |
| <b>MYC syn</b>        | 0 (0-0) | 1 (1-4) | 1 (1-1) | 0-99 |
| <b>NRF2 syn</b>       | 0 (0-0) | 0 (0-0) | 0 (0-0) | --   |

**Table S5. Clinical-pathological characteristics of the CD4/6i naïve control cohort of 181 HR+/HER2- patients**  
*Abbreviations: CNS: central nervous system; ET: endocrine treatment ; IDC: invasive ductal carcinoma; ILC: invasive lobular carcinoma; MXD: mixed histology N: number; NA: not applicable*

| Variable                   | CDK4/6i naïve cohort<br>N=181 (%) |
|----------------------------|-----------------------------------|
| <b>Histotype (N=164)</b>   |                                   |
| IDC                        | 121 (73·8)                        |
| ILC                        | 33 (20·1)                         |
| mixed                      | 10 (6·1)                          |
| <b>Lung (N=181)</b>        |                                   |
| No                         | 135 (74·6)                        |
| Yes                        | 46 (25·4)                         |
| <b>Liver (N=181)</b>       |                                   |
| No                         | 136 (75·1)                        |
| Yes                        | 45 (24·9)                         |
| <b>Bone (N=181)</b>        |                                   |
| No                         | 48 (26·5)                         |
| Yes                        | 133 (73·5)                        |
| <b>Lymph node (N=181)</b>  |                                   |
| No                         | 114 (70·0)                        |
| Yes                        | 67 (30·0)                         |
| <b>Soft tissue (N=181)</b> |                                   |
| No                         | 160 (88·4)                        |
| Yes                        | 21 (11·6)                         |
| <b>CNS (N=181)</b>         |                                   |
| No                         | 169 (93·4)                        |
| Yes                        | 12 (6·6)                          |
| <b>De novo (N=181)</b>     |                                   |
| No                         | 153 (84·6)                        |
| Yes                        | 28 (15·5)                         |

**Table S6. Prevalence of somatic SNVs e CNVs pathway mutations in the post-CDK4/6i and CDK4/6i naïve cohorts**

*Abbreviations: CNVs: Copy Number Variations; N: number; SNVs: Single Nucleotide*

|                   | Post CDK4/6i cohort (N=93)<br>N (%) | CDK4/6i naïve cohort (N=181)<br>N (%) | P value (Chi-square test) |
|-------------------|-------------------------------------|---------------------------------------|---------------------------|
| <b>SNVs</b>       |                                     |                                       |                           |
| <b>PI3K</b>       | 39 (41.9)                           | 67 (37.0)                             | 0.43                      |
| <b>ER</b>         | 46 (49.5)                           | 28 (15.5)                             | <b>&lt;0.001</b>          |
| <b>p53</b>        | 32 (34.4)                           | 59 (32.6)                             | 0.76                      |
| <b>RTK</b>        | 5 (5.4)                             | 13 (7.2)                              | 0.57                      |
| <b>Cell-cycle</b> | 4 (4.3)                             | 4 (2.2)                               | 0.33                      |
| <b>RAS</b>        | 8 (8.6)                             | 13(7.2)                               | 0.68                      |
| <b>NOTCH1</b>     | 0 (0.0)                             | 2 (1.1)                               | 0.31                      |
| <b>RAF</b>        | 3 (3.2)                             | 2 (1.1)                               | 0.21                      |
| <b>WNT</b>        | 2 (2.2)                             | 5 (2.8)                               | 0.76                      |
| <b>MEK</b>        | 0 (0.0)                             | 1 (0.6)                               | 0.47                      |
| <b>NRF2</b>       | 1 (1.1)                             | 0 (0.0)                               | 0.16                      |
| <b>CNVs</b>       |                                     |                                       |                           |
| <b>RTK</b>        | 15 (16.1)                           | 35 (19.3)                             | 0.51                      |
| <b>RAF</b>        | 4 (4.3)                             | 4 (2.2)                               | 0.33                      |
| <b>Cell-cycle</b> | 11 (11.8)                           | 21 (11.6)                             | 0.96                      |
| <b>RAS</b>        | 4 (4.3)                             | 3 (1.7)                               | 0.19                      |
| <b>ER</b>         | 2 (2.2)                             | 2 (1.1)                               | 0.45                      |
| <b>PI3K</b>       | 6 (6.5)                             | 8(4.4)                                | 0.47                      |
| <b>MYC</b>        | 6 (6.5)                             | 7 (3.9)                               | 0.34                      |

**Table S7. Prevalence of somatic single gene CNVs in the post-CDK4/6i and CDK4/6i naïve cohorts**  
*Abbreviations: CNVs: Copy Number Variations; N: number*

| Gene (CNVs)   | Post CDK4/6i cohort (N=93)<br>N (%) | CDK4/6i naïve cohort (N=181)<br>N (%) | P value (Chi -<br>square test) |
|---------------|-------------------------------------|---------------------------------------|--------------------------------|
| <i>KIT</i>    | 1 (1·1)                             | 1 (0·6)                               | 0·63                           |
| <i>PDGFRA</i> | 1 (1·1)                             | 4 (2·2)                               | 0·51                           |
| <i>BRAF</i>   | 2 (2·2)                             | 3 (1·7)                               | 0·77                           |
| <i>ERBB2</i>  | 0 (0·0)                             | 1 (0·6)                               | 0·47                           |
| <i>FGFR1</i>  | 12 (12·9)                           | 22 (12·2)                             | 0·86                           |
| <i>CDK4</i>   | 2 (2·2)                             | 5 (2·8)                               | 0·76                           |
| <i>CCND1</i>  | 10 (10·8)                           | 11 (6·1)                              | 0·17                           |
| <i>KRAS</i>   | 4 (4·3)                             | 3 (1·7)                               | 0·19                           |
| <i>AR</i>     | 2 (2·2)                             | 1 (0·6)                               | 0·23                           |
| <i>RAF1</i>   | 3 (3·2)                             | 3 (1·7)                               | 0·40                           |
| <i>CDK6</i>   | 3 (3·2)                             | 4 (3·2)                               | 0·61                           |
| <i>PIK3CA</i> | 6 (6·5)                             | 8 (4·4)                               | 0·47                           |
| <i>EGFR</i>   | 5 (5·4)                             | 14 (7·7)                              | 0·47                           |
| <i>MYC</i>    | 6 (6·5)                             | 7 (3·9)                               | 0·34                           |
| <i>MET</i>    | 0 (0·0)                             | 3 (1·7)                               | 0·21                           |
| <i>CCNE1</i>  | 2 (2·2)                             | 6 (3·3)                               | 0·59                           |
| <i>CCND2</i>  | 1 (1·1)                             | 0 (0·0)                               | 0·16                           |
| <i>FGFR2</i>  | 1 (1·1)                             | 1 (0·6)                               | 0·63                           |
| <i>ERBB3</i>  | 0 (0·0)                             | 0 (0·0)                               | --                             |
| <i>ESR1</i>   | 0 (0·0)                             | 1 (0·6)                               | 0·47                           |

**Table S8. Prevalence of somatic single gene SNVs in the post-CDK4/6i and CDK4/6i naïve cohorts**  
Abbreviations: N: number; SNVs: Single Nucleotide

| Gene (SNVs)   | Post CDK4/6i cohort<br>(N=93)<br>N (%) | CDK4/6i naïve cohort<br>(N=181)<br>N (%) | P value (Chi -<br>square test) |
|---------------|----------------------------------------|------------------------------------------|--------------------------------|
| <i>KIT</i>    | 0 (0.0)                                | 0 (0.0)                                  | --                             |
| <i>PDGFRA</i> | 0 (0.0)                                | 1 (0.6)                                  | 0.47                           |
| <i>BRAF</i>   | 3 (3.2)                                | 1 (0.6)                                  | 0.08                           |
| <i>ERBB2</i>  | 3 (3.2)                                | 6 (3.3)                                  | 0.97                           |
| <i>FGFR1</i>  | 0 (0.0)                                | 0 (0.0)                                  | --                             |
| <i>CCND1</i>  | 0 (0.0)                                | 0 (0.0)                                  | --                             |
| <i>KRAS</i>   | 5 (5.4)                                | 8 (4.4)                                  | 0.72                           |
| <i>RAF1</i>   | 0 (0.0)                                | 0 (0.0)                                  | --                             |
| <i>PIK3CA</i> | 35 (37.6)                              | 54 (29.8)                                | 0.19                           |
| <i>EGFR</i>   | 2 (2.2)                                | 1 (0.6)                                  | 0.22                           |
| <i>FGFR2</i>  | 1 (1.1)                                | 2 (1.1)                                  | 0.98                           |
| <i>ESR1</i>   | 43 (46.2)                              | 12 (6.6)                                 | <b>&lt;0.001</b>               |
| <i>TP53</i>   | 29 (31.2)                              | 52 (28.7)                                | 0.67                           |
| <i>ARID1A</i> | 5 (5.4)                                | 14 (7.7)                                 | 0.47                           |
| <i>CDKN2A</i> | 1 (1.1)                                | 2 (1.1)                                  | 0.98                           |
| <i>NF1</i>    | 3 (3.2)                                | 2 (1.1)                                  | 0.21                           |
| <i>PTEN</i>   | 5 (5.4)                                | 3 (1.7)                                  | 0.083                          |
| <i>CDH1</i>   | 4 (4.3)                                | 7 (3.9)                                  | 0.86                           |
| <i>AKT1</i>   | 2 (2.2)                                | 14 (7.7)                                 | 0.062                          |
| <i>GATA3</i>  | 9 (9.7)                                | 16 (8.8)                                 | 0.82                           |
| <i>SMAD4</i>  | 2 (2.2)                                | 2 (1.1)                                  | 0.49                           |
| <i>RB1</i>    | 3 (3.2)                                | 2 (1.1)                                  | 0.21                           |
| <i>FBXW7</i>  | 0 (0.0)                                | 1 (0.6)                                  | 0.47                           |
| <i>HRAS</i>   | 1 (1.1)                                | 2 (1.1)                                  | 0.98                           |
| <i>GNAS</i>   | 1 (1.1)                                | 3 (1.7)                                  | 0.70                           |
| <i>BRCA2</i>  | 2 (2.2)                                | 4 (2.2)                                  | 0.97                           |
| <i>IDH1</i>   | 0 (0.0)                                | 1 (0.4)                                  | --                             |
| <i>NRAS</i>   | 0 (0.0)                                | 2 (1.1)                                  | 0.31                           |
| <i>BRCA1</i>  | 2 (2.2)                                | 0 (0.0)                                  | <b>0.048</b>                   |
| <i>VHL</i>    | 0 (0.0)                                | 1 (0.6)                                  | 0.47                           |
| <i>RHOA</i>   | 0 (0.0)                                | 1 (0.6)                                  | 0.47                           |
| <i>APC</i>    | 1 (1.1)                                | 5 (2.8)                                  | 0.37                           |

|               |         |          |              |
|---------------|---------|----------|--------------|
| <i>JAK2</i>   | 0 (0-0) | 1 (0-6)  | 0·47         |
| <i>STK11</i>  | 1 (1·1) | 1 (0-6)  | 0·63         |
| <i>PTPN11</i> | 0 (0-0) | 0 (0-0)  | --           |
| <i>ATM</i>    | 1 (1·1) | 7 (3-9)  | 0·19         |
| <i>RET</i>    | 0 (0-0) | 2 (1·1)  | 0·31         |
| <i>TERT</i>   | 0 (0-0) | 0 (0-0)  | --           |
| <i>IDH2</i>   | 0 (0-0) | 4 (2-2)  | 0·165        |
| <i>FGFR3</i>  | 0 (0-0) | 0 (0-0)  | --           |
| <i>MAPK1</i>  | 0 (0-0) | 1 (0·46) | 0·47         |
| <i>RIT1</i>   | 0 (0-0) | 1 (0-6)  | 0·47         |
| <i>CTNNB1</i> | 1 (1·1) | 0 (0-0)  | 0·16         |
| <i>CDK12</i>  | 0 (0-0) | 1 (0-6)  | 0·47         |
| <i>TSC1</i>   | 1 (1·1) | 0 (0-0)  | 0·16         |
| <i>ARAF</i>   | 0 (0-0) | 1 (0-6)  | 0·47         |
| <i>NFE2L2</i> | 1 (1·1) | 0 (0-0)  | 0·16         |
| <i>MPL</i>    | 0 (0-0) | 0 (0-0)  | --           |
| <i>HNF1A</i>  | 0 (0-0) | 0 (0-0)  | --           |
| <i>NOTCH1</i> | 0 (0-0) | 1 (06)   | 0·47         |
| <i>CHEK2</i>  | 2 (2·2) | 0 (00)   | <b>0·048</b> |
| <i>JAK3</i>   | 0 (0-0) | 0 (0-0)  | --           |
| <i>MAP2K2</i> | 0 (0-0) | (0-0)    | --           |

**Table S9. Multivariable logistic regression analysis of ESR1 and ER pathway between post-CDK4/6i and CDK4/6i naïve cohort**

Abbreviations: CDK4/6i: CDK4/6 inhibitors; mets: metastasis.

|                              | OR     | 95% C.I. |        | P value |
|------------------------------|--------|----------|--------|---------|
| <i>ESR1</i> SNVs             |        |          |        |         |
| Lung mets                    | 0.958  | 0.368    | 2.497  | 0.930   |
| Liver mets                   | 1.699  | 0.790    | 3.657  | 0.175   |
| Bone mets                    | 4.938  | 1.513    | 16.117 | 0.008   |
| Lymphnode mets               | 1.199  | 0.512    | 2.810  | 0.676   |
| Soft tissue                  | 0.493  | 0.143    | 1.705  | 0.264   |
| De novo                      | 1.334  | 0.587    | 3.031  | 0.491   |
| CDK4/6i exposure (yes vs no) | 14.456 | 6.349    | 32.914 | <0.001  |
| Path ER SNVs                 |        |          |        |         |
| Lung mets                    | 1.070  | 0.472    | 2.429  | 0.871   |
| Liver mets                   | 1.415  | 0.726    | 2.769  | 0.308   |
| Bone mets                    | 3.655  | 1.443    | 9.254  | 0.006   |
| Lymphnode mets               | 1.052  | 0.511    | 2.165  | 0.890   |
| Soft tissue                  | 0.351  | 0.113    | 1.087  | 0.801   |
| De novo                      | 1.099  | 0.5256   | 2.296  | 0.801   |
| CDK4/6i exposure (yes vs no) | 5.857  | 3.098    | 11.073 | <0.001  |

\*18 patients in the CDK4/6i-naïve cohort with prior endocrine therapy in the (neo)adjuvant setting were excluded to avoid treatment-related bias.

**a**

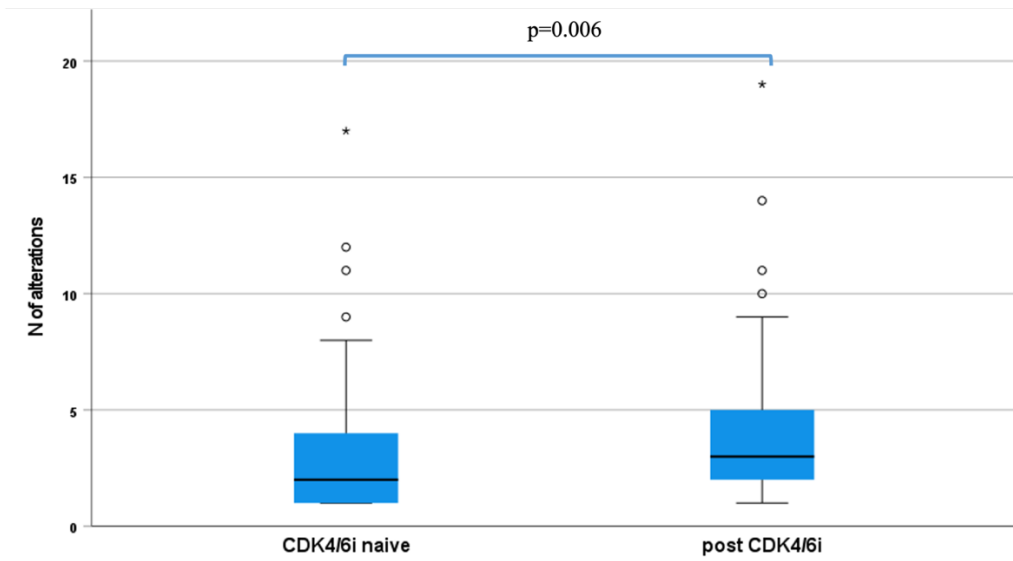

**b**

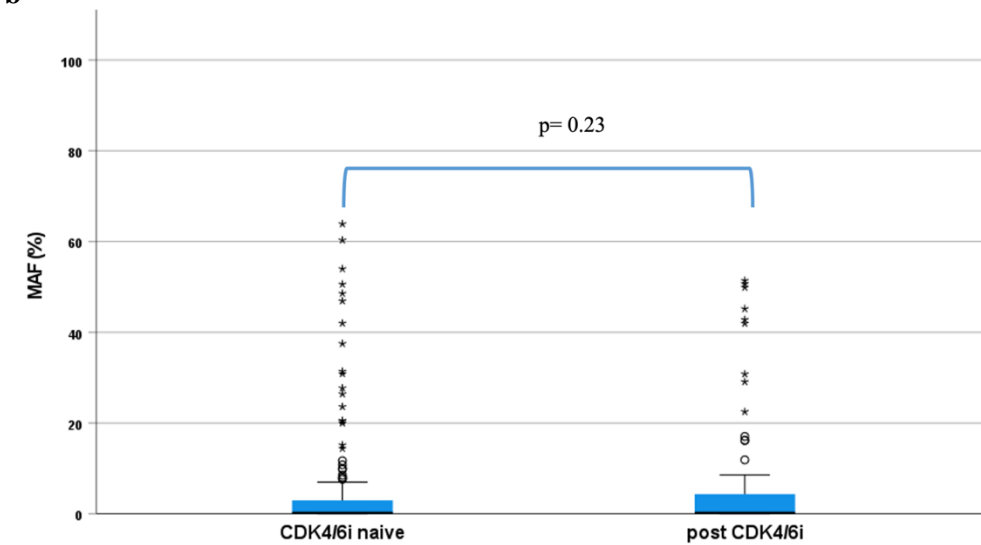

**Figure S1**· Differences in MAF (a) and NOA (b) between post-CDK4/6i and CDK4/6i naïve cohorts represented by box-plot. A statistically significantly higher incidence of NOA after the selective pressure driven by the drug exposure ( $p=0.006$ ) was showed, while no difference was observed in terms of MAF ( $p=0.23$ )

*Abbreviations: CDK4/6i: CDK4/6 inhibitors; MAF: mutant allele frequency; NOA: Number of alterations*
